# Supplementary material for: Analytical and Clinical Validation of a High Accuracy Fully Automated Digital Immunoassay for Plasma Phospho-Tau 217 for Clinical Use in Detecting Amyloid Pathology
Source: bioRxiv or medRxiv preprint supplement (doi:10.1101/2024.10.31.24316186), 2024-11-04
Supplement: Supplementary file [file media-1.pdf]

**Figure S1: Age Distributions of Bio-Hermes and Amsterdam Cohort**

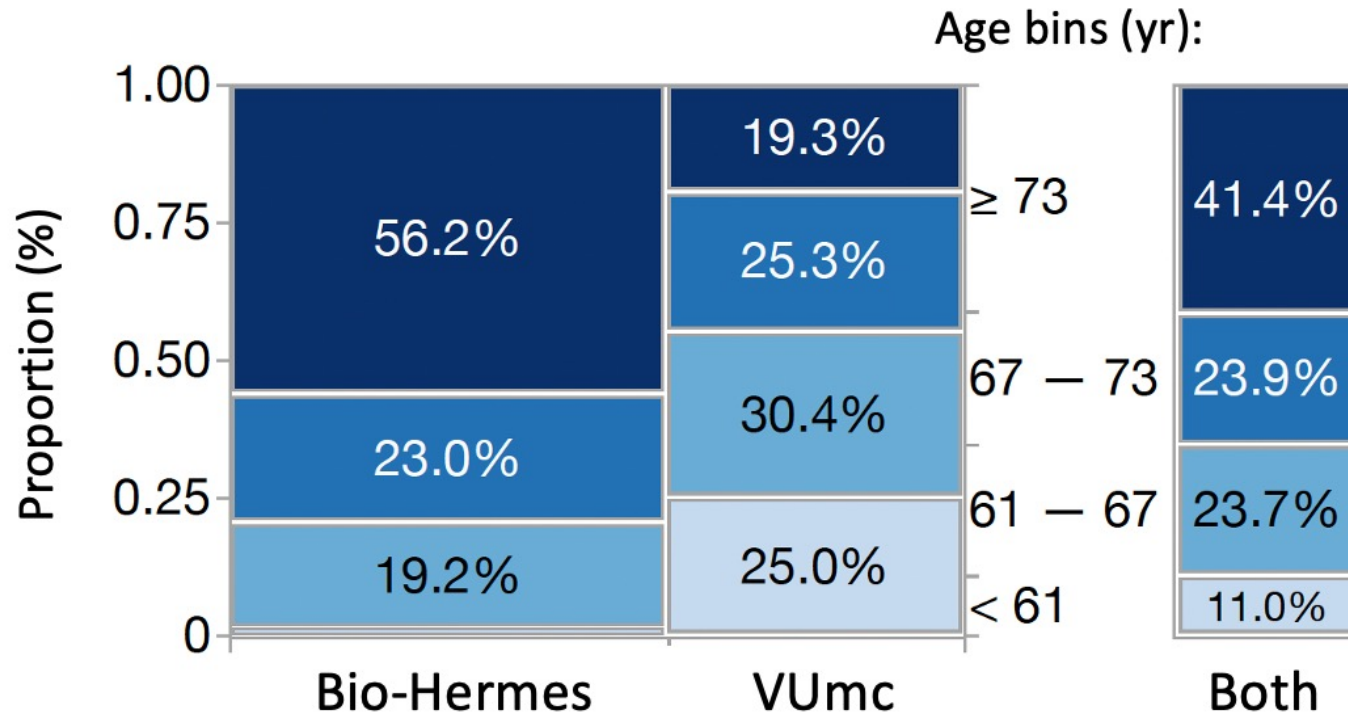

**Figure S1:** Proportion of participant ages by bins across the two cohorts.

**Figure S2: ROC Curves Across Racial/Ethnic Groups**  
Bio-Hermes symptomatic groups cohort only

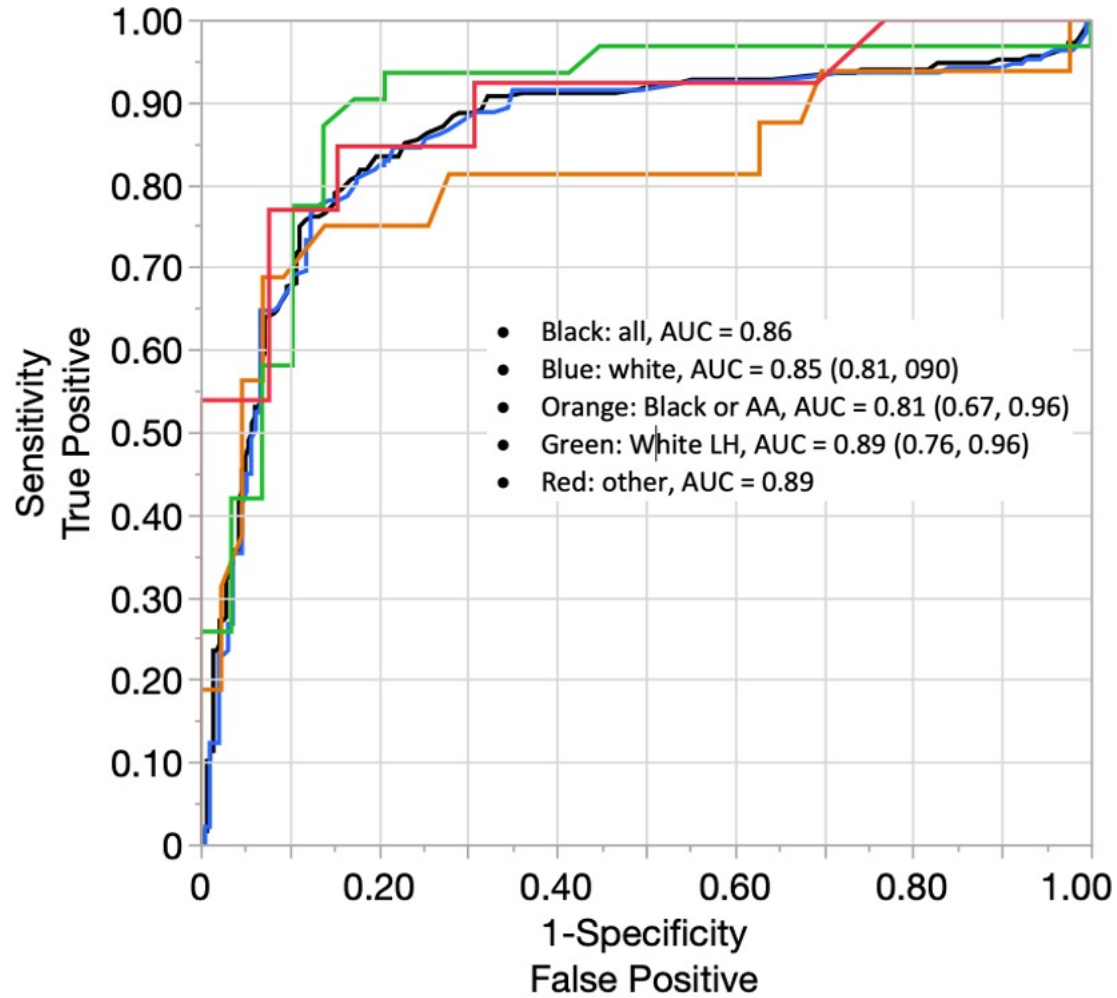

**Figure S2:** ROC curves as predictors of amyloid status (with 95% CI's)

**Table S1:  
Demographic characteristics  
by cohort**

|                                           | BH<br>N = 521 | VUMC<br>N = 352 | All<br>N =873 |
|-------------------------------------------|---------------|-----------------|---------------|
| <b>Age</b>                                |               |                 |               |
| Mean (sd)                                 | 73.2 (6.6)    | 65.4 (7.7)      | 70.1 (8.0)    |
| Range                                     | 59 – 85       | 43 – 83         | 43 - 85       |
| <b>Sex</b>                                |               |                 |               |
| Female                                    | 277 (53.2%)   | 162 (46.0%)     | 439 (50.3%)   |
| <b>Race</b>                               |               |                 |               |
| American Indian or Alaska Native          | 1 (0.2%)      | 0 (0.0%)        | 1 (0.1%)      |
| Asian                                     | 10 (1.9%)     | 0 (0.0%)        | 10 (1.5%)     |
| Black or African American                 | 60 (11.5%)    | 0 (0.0%)        | 60 (8.9%)     |
| Native Hawaiian or other Pacific Islander | 1 (0.2%)      | 0 (0.0%)        | 1 (0.1%)      |
| Other/Unknown                             | 5 (1.0%)      | 14 (9.0%)       | 19 (2.8%)     |
| White                                     | 444 (85.2%)   | 142 (91.0%)     | 586 (86.6%)   |
| Missing†                                  | 0             | 196             | 196           |
| †Not included in %s                       |               |                 |               |
| <b>Ethnicity</b>                          |               |                 |               |
| Hispanic or Latino                        | 68 (13.1%)    | 0 (0.0%)        | 68 (7.8%)     |
| Not Hispanic or Latino                    | 446 (85.6%)   | 0 (0.0%)        | 446 (51.1%)   |
| Not Reported                              | 7 (1.34%)     | 0 (0.0%)        | 7 (0.8%)      |
| Unknown                                   | 0 (0.0%)      | 352             | 352 (40.3%)   |
| <b>Diagnosis</b>                          |               |                 |               |
| AD                                        | 0 (0.0%)      | 123 (34.9%)     | 123 (14.1%)   |
| Probable AD                               | 235 (45.1%)   | 0 (0.0%)        | 235 (26.9%)   |
| MCI                                       | 286 (54.9%)   | 229 (65.1%)     | 515 (59.0%)   |
| <b>MMSE</b>                               |               |                 |               |
| Mean (sd)                                 | 24.1 (4.3)    | 26.2 (2.7)      | 25.0 (3.8)    |
| Range                                     | 2 - 30        | 16 - 30         | 2 - 30        |
| Missing data                              | 2             | 2               | 4             |
| <b>APOE e4 carrier/non carrier</b>        |               |                 |               |
| E2E2                                      | 1 (0.2%)      | 1 (0.3%)        | 2 (0.2%)      |
| E2E3                                      | 49 (9.4%)     | 15 (4.3%)       | 64 (7.3%)     |
| E2E4                                      | 13 (2.5%)     | 4 (1.1%)        | 17 (1.9%)     |
| E3E3                                      | 259 (49.7%)   | 119 (33.8%)     | 378 (43.3%)   |
| E3E4                                      | 166 (31.9%)   | 132 (37.5%)     | 298 (34.1%)   |
| E4E4                                      | 33 (6.3%)     | 65 (18.5%)      | 98 (11.2%)    |
| Missing                                   | 0 (0.0%)      | 16 (4.5%)       | 16 (1.8%)     |
| <b>Plasma p-tau217 Conc. (pg/mL)</b>      |               |                 |               |
| Mean (sd)                                 | 0.09 (0.08)   | 0.10 (0.09)     | 0.09 (0.08)   |
| <b>Amyloid Status</b>                     |               |                 |               |
| CSF                                       | 0 (0.0%)      | 337 (95.7%)     | 337 (38.6%)   |
| PET                                       | 521 (100.0%)  | 15 (4.3%)       | 536 (61.4%)   |

**Table S1:** Amyloid classification based on amyloid PET or CSF biomarkers. Abbreviations: MCI = mild cognitive impairment; MMSE = Mini-Mental State Examination; PET = positron emission tomography.

**Table S2: Amyloid Prevalence by Diagnostic Category**

|        |              | AMYLOID  |        |          |        |     |         |
|--------|--------------|----------|--------|----------|--------|-----|---------|
|        |              | POSITIVE |        | NEGATIVE |        | All |         |
| Source | Group Simple | N        | Row %  | N        | Row %  | N   | Row %   |
| BH     | Probable AD  | 144      | 61.28% | 91       | 38.72% | 235 | 100.00% |
|        | MCI          | 100      | 34.97% | 186      | 65.03% | 286 | 100.00% |
|        | All          | 244      | 46.83% | 277      | 53.17% | 521 | 100.00% |
| VUMC   | AD           | 122      | 99.19% | 1        | 0.81%  | 123 | 100.00% |
|        | MCI          | 129      | 56.33% | 100      | 43.67% | 229 | 100.00% |
|        | All          | 251      | 71.31% | 101      | 28.69% | 352 | 100.00% |
| All    | All          | 495      | 56.70% | 378      | 43.30% | 873 | 100.00% |

**Table S3: PPV and NPV of Simoa p-Tau 217 assay by prevalence**

| Population                      | Prevalence | PPV   | NPV   |
|---------------------------------|------------|-------|-------|
| Cognitively normal older adults | 20.0%      | 72.2% | 97.4% |
| Subjective cognitive decline    | 30.0%      | 81.6% | 95.6% |
| Mild cognitive impairment       | 50.0%      | 91.2% | 90.4% |
| Prevalence in this study        | 56.7%      | 93.1% | 87.8% |
| Dementia population             | 65.0%      | 95.1% | 83.5% |

Typical prevalences for different populations, and the prevalence observed in the study reported here. Abbreviations: PPV, positive predictive value; NPV, negative predictive value.

**Table S4: Performance Metrics with 95% CI for Various Combinations of Data Sets**

| Data Set                   | Measures                 | Est    | LCI   | UCI    |
|----------------------------|--------------------------|--------|-------|--------|
| BH Training                | Prevalence               | 43.8%  | 35.3% | 52.6%  |
|                            | False Negative Rate      | 4.9%   | 0.3%  | 44.7%  |
|                            | False Positive Rate      | 5.1%   | 0.4%  | 38.8%  |
|                            | % in Indeterminant Range | 37.4%  | 28.7% | 46.9%  |
|                            | Accuracy                 | 92.0%  | 86.8% | 95.3%  |
|                            | Sensitivity              | 93.1%  | 85.4% | 96.9%  |
| AMST Training              | Prevalence               | 91.0%  | 82.8% | 95.5%  |
|                            | False Negative Rate      | 78.8%  | 71.0% | 84.9%  |
|                            | False Positive Rate      | 5.4%   | 0.4%  | 41.9%  |
|                            | % in Indeterminant Range | 0.0%   | .     | .      |
|                            | Accuracy - Ind           | 26.7%  | 15.9% | 41.2%  |
|                            | Accuracy - Ind           | 94.2%  | 88.3% | 97.2%  |
| Both Training              | Sensitivity              | 92.4%  | 84.7% | 96.4%  |
|                            | Specificity              | 100.0% | 88.3% | 100.0% |
|                            | Prevalence               | 56.7%  | 50.6% | 62.7%  |
|                            | False Negative Rate      | 5.1%   | 0.7%  | 30.1%  |
|                            | False Positive Rate      | 4.1%   | 0.3%  | 37.7%  |
|                            | % in Indeterminant Range | 33.4%  | 26.3% | 41.3%  |
| BH Validation              | Accuracy - Ind           | 92.9%  | 89.3% | 95.4%  |
|                            | Sensitivity              | 92.7%  | 87.7% | 95.8%  |
|                            | Specificity              | 93.2%  | 86.9% | 96.6%  |
|                            | Prevalence               | 50.4%  | 41.6% | 59.2%  |
|                            | False Negative Rate      | 10.7%  | 2.4%  | 37.0%  |
|                            | False Positive Rate      | 10.1%  | 2.1%  | 37.5%  |
| AMST Validation            | % in Indeterminant Range | 30.0%  | 20.6% | 41.4%  |
|                            | Accuracy - Ind           | 85.1%  | 78.4% | 90.0%  |
|                            | Sensitivity              | 85.6%  | 76.0% | 91.7%  |
|                            | Specificity              | 84.6%  | 74.0% | 91.4%  |
|                            | Prevalence               | 64.7%  | 55.9% | 72.6%  |
|                            | False Negative Rate      | 7.4%   | 1.0%  | 39.4%  |
| Both Validation            | False Positive Rate      | 1.5%   | 0.0%  | 80.0%  |
|                            | % in Indeterminant Range | 26.2%  | 16.0% | 39.9%  |
|                            | Accuracy - Ind           | 92.8%  | 86.9% | 96.1%  |
|                            | Sensitivity              | 90.2%  | 81.9% | 94.9%  |
|                            | Specificity              | 97.8%  | 88.5% | 99.6%  |
|                            | Prevalence               | 56.7%  | 50.4% | 62.8%  |
| BH Training & Validation   | False Negative Rate      | 9.1%   | 2.5%  | 27.8%  |
|                            | False Positive Rate      | 7.0%   | 1.2%  | 32.5%  |
|                            | % in Indeterminant Range | 28.3%  | 21.1% | 36.9%  |
|                            | Accuracy - Ind           | 88.6%  | 84.2% | 91.8%  |
|                            | Sensitivity              | 87.9%  | 82.0% | 92.1%  |
|                            | Specificity              | 89.5%  | 82.4% | 94.0%  |
| AMST Training & Validation | Prevalence               | 46.8%  | 40.7% | 53.1%  |
|                            | False Negative Rate      | 7.8%   | 1.8%  | 28.0%  |
|                            | False Positive Rate      | 7.2%   | 1.6%  | 26.6%  |
|                            | % in Indeterminant Range | 34.0%  | 27.4% | 41.2%  |
|                            | Accuracy - Ind           | 88.7%  | 84.6% | 91.8%  |
|                            | Sensitivity              | 89.3%  | 83.5% | 93.2%  |
| Both Training & Validation | Specificity              | 88.0%  | 81.8% | 92.3%  |
|                            | Prevalence               | 71.3%  | 65.4% | 76.5%  |
|                            | False Negative Rate      | 6.4%   | 1.2%  | 28.5%  |
|                            | False Positive Rate      | 1.0%   | 0.0%  | 79.8%  |
|                            | % in Indeterminant Range | 26.4%  | 18.5% | 36.2%  |
|                            | Accuracy - Ind           | 93.4%  | 89.6% | 95.9%  |
| AMST Training & Validation | Sensitivity              | 91.3%  | 86.1% | 94.7%  |
|                            | Specificity              | 98.7%  | 92.8% | 99.8%  |
|                            | Prevalence               | 56.7%  | 52.3% | 61.0%  |
|                            | False Negative Rate      | 7.1%   | 2.2%  | 20.4%  |
|                            | False Positive Rate      | 5.6%   | 1.1%  | 23.8%  |
|                            | % in Indeterminant Range | 30.9%  | 25.7% | 36.7%  |
| Both Training & Validation | Accuracy                 | 90.7%  | 88.0% | 92.9%  |
|                            | Sensitivity              | 90.3%  | 86.6% | 93.1%  |
|                            | Specificity              | 91.3%  | 86.9% | 94.4%  |
|                            | Prevalence               | 56.7%  | 52.3% | 61.0%  |
|                            | False Negative Rate      | 7.1%   | 2.2%  | 20.4%  |
|                            | False Positive Rate      | 5.6%   | 1.1%  | 23.8%  |

**Table S5: Tukey-Kramer Comparisons of Pairwise Differences in Mean p-Tau 217 Values Across Racial/Ethnic Groups**

**Amyloid Positives**

| Level       | - Level     | Difference | Std Err Dif | Lower CL  | Upper CL  | p-Value | -0.02 | 0 | 0.02 |
|-------------|-------------|------------|-------------|-----------|-----------|---------|-------|---|------|
| White       | Black or AA | 0.0129517  | 0.0081627   | -0.003118 | 0.0290210 | 0.1137  |       |   |      |
| Other, Unkn | Black or AA | 0.0101020  | 0.0153279   | -0.020073 | 0.0402769 | 0.5104  |       |   |      |
| White, LH   | Black or AA | 0.0071524  | 0.0116367   | -0.015756 | 0.0300606 | 0.5393  |       |   |      |
| White       | White, LH   | 0.0057993  | 0.0096416   | -0.013181 | 0.0247800 | 0.5480  |       |   |      |
| Other, Unkn | White, LH   | 0.0029496  | 0.0161640   | -0.028871 | 0.0347705 | 0.8553  |       |   |      |
| White       | Other, Unkn | 0.0028497  | 0.0138742   | -0.024463 | 0.0301629 | 0.8374  |       |   |      |

**Amyloid Negatives**

| Level       | - Level     | Difference | Std Err Dif | Lower CL  | Upper CL  | p-Value | -0.02 | 0 | 0.02 |
|-------------|-------------|------------|-------------|-----------|-----------|---------|-------|---|------|
| White       | Black or AA | 0.0129517  | 0.0081627   | -0.003118 | 0.0290210 | 0.1137  |       |   |      |
| Other, Unkn | Black or AA | 0.0101020  | 0.0153279   | -0.020073 | 0.0402769 | 0.5104  |       |   |      |
| White, LH   | Black or AA | 0.0071524  | 0.0116367   | -0.015756 | 0.0300606 | 0.5393  |       |   |      |
| White       | White, LH   | 0.0057993  | 0.0096416   | -0.013181 | 0.0247800 | 0.5480  |       |   |      |
| Other, Unkn | White, LH   | 0.0029496  | 0.0161640   | -0.028871 | 0.0347705 | 0.8553  |       |   |      |
| White       | Other, Unkn | 0.0028497  | 0.0138742   | -0.024463 | 0.0301629 | 0.8374  |       |   |      |
